# Supplementary material
Source: Springer Nature journal article supplement (https://www.springermedizin.de/resource/supplementary/12913_2006_246_MOESM2_ESM.pdf/9534676)

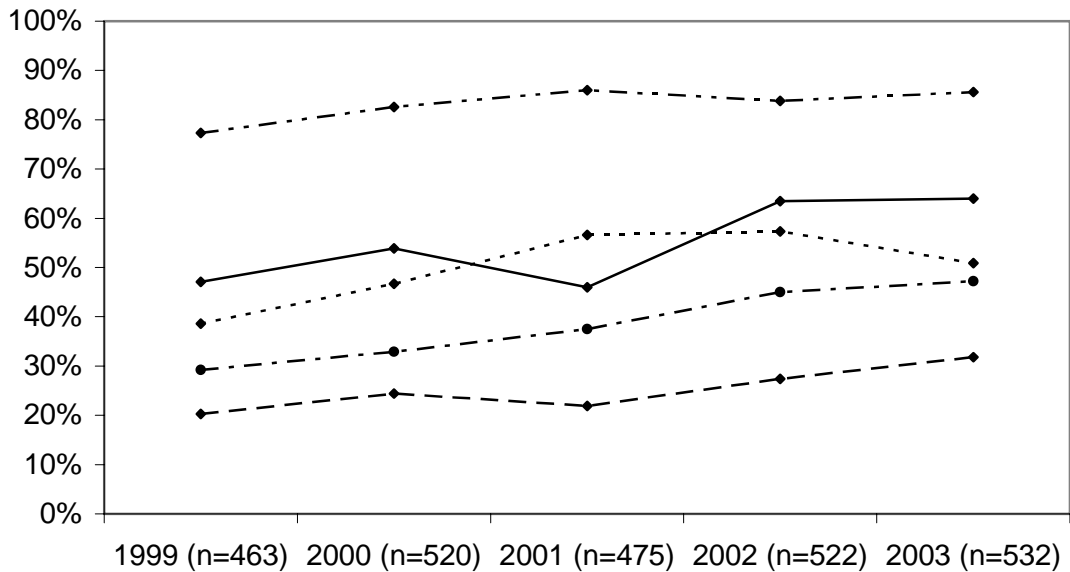

- ◆ - Impaired mobility    —◆— Impaired cognition    ···◆··· History of falls  
 - ●-· Narcotic use        -◆- Psychotropic use

Supplement: MOESM2 [file 9534676]
